# Supplementary material for: Effect of Nitric Oxide Pathway Inhibition on the Evolution of Anaphylactic Shock in Animal Models: A Systematic Review
Source: MDPI journal article supplement (doi:10.3390/biology11060919), 2022-06-15
Supplement: s1 [file s1]

**Supplemental Figure S1.** SYRCLE's risk of bias tool[22]. The excel sheet created to assess the risk of bias. Each row reflects a different paper. A summary is available in figure 4.

| Pretreatment                | 1 was the allocation sequence adequately generated and applied? (were they randomised) | 2 were the groups similar at baseline or were they adjusted for confounders in the analysis? | 3 was the allocation adequately concealed? | 4 were the animals randomly housed during the experiment? | 5 were the caregivers &/or investigators blinded from knowledge which intervention each animal received during the experiment? | 6 were animals selected at random for outcome assessment? | 7 was the outcome assessor blinded? | 8 were incomplete outcome data adequately addressed? |                                                                                                             |                                                                                                                |                                                             | 9 Are reports of the study free of selective outcome reporting? | 10 was the study apparently free of other problems that could result in high risk of bias? |                                                               |
|-----------------------------|----------------------------------------------------------------------------------------|----------------------------------------------------------------------------------------------|--------------------------------------------|-----------------------------------------------------------|--------------------------------------------------------------------------------------------------------------------------------|-----------------------------------------------------------|-------------------------------------|------------------------------------------------------|-------------------------------------------------------------------------------------------------------------|----------------------------------------------------------------------------------------------------------------|-------------------------------------------------------------|-----------------------------------------------------------------|--------------------------------------------------------------------------------------------|---------------------------------------------------------------|
|                             |                                                                                        |                                                                                              |                                            |                                                           |                                                                                                                                |                                                           |                                     | Were all animals included in the analysis?           | Were the reasons for missing outcome data unlikely to be related to true outcome? (e.g., technical failure) | Are missing outcome data balanced in numbers across intervention groups, with similar reasons for missing data | Are missing outcome data imputed using appropriate methods? |                                                                 | a - Was the study free of contamination (pooling drugs)?                                   | b - Was the study free of inappropriate influence of funders? |
| Osada et al.1994            | Unclear                                                                                | Yes                                                                                          | No                                         | Unclear                                                   | No                                                                                                                             | Unclear                                                   | No                                  | Yes                                                  | ?                                                                                                           | ?                                                                                                              | ?                                                           | Yes                                                             | Yes                                                                                        | Unclear                                                       |
| Mitsuhashi et al. 1995      | Unclear                                                                                | Yes                                                                                          | No                                         | Unclear                                                   | No                                                                                                                             | Unclear                                                   | No                                  | No                                                   | Yes                                                                                                         | No                                                                                                             | Yes                                                         | Yes                                                             | Yes                                                                                        | Yes                                                           |
| Shibamoto et al. 1996       | Unclear                                                                                | Yes                                                                                          | No                                         | Unclear                                                   | No                                                                                                                             | Unclear                                                   | No                                  | Yes                                                  | ?                                                                                                           | ?                                                                                                              | ?                                                           | Yes                                                             | Yes                                                                                        | Yes                                                           |
| Bellou et al. 2003          | Unclear                                                                                | Yes                                                                                          | No                                         | Yes                                                       | No                                                                                                                             | Unclear                                                   | No                                  | Yes                                                  | ?                                                                                                           | ?                                                                                                              | ?                                                           | Yes                                                             | Yes                                                                                        | Yes                                                           |
| Buzato et al. 2005          | Unclear                                                                                | Yes                                                                                          | No                                         | Unclear                                                   | No                                                                                                                             | Unclear                                                   | No                                  | Yes                                                  | ?                                                                                                           | ?                                                                                                              | ?                                                           | Yes                                                             | Yes                                                                                        | Yes                                                           |
| Cauwels et al. 2006         | Unclear                                                                                | Yes                                                                                          | No                                         | Yes                                                       | No                                                                                                                             | Unclear                                                   | No                                  | Yes                                                  | ?                                                                                                           | ?                                                                                                              | ?                                                           | Yes                                                             | Yes                                                                                        | Yes                                                           |
| Takano et al. 2007          | Unclear                                                                                | Yes                                                                                          | No                                         | Yes                                                       | No                                                                                                                             | Unclear                                                   | No                                  | Unclear                                              | ?                                                                                                           | ?                                                                                                              | ?                                                           | Yes                                                             | Yes                                                                                        | Yes                                                           |
| Zhang et al. 2009           | Unclear                                                                                | Yes                                                                                          | No                                         | Yes                                                       | No                                                                                                                             | Unclear                                                   | No                                  | Yes                                                  | ?                                                                                                           | ?                                                                                                              | ?                                                           | Yes                                                             | Yes                                                                                        | Yes                                                           |
| Menardi AC et al. 2011      | Unclear                                                                                | Yes                                                                                          | No                                         | Unclear                                                   | No                                                                                                                             | Unclear                                                   | No                                  | Yes                                                  | ?                                                                                                           | ?                                                                                                              | ?                                                           | Yes                                                             | Yes                                                                                        | Yes                                                           |
| Shinomiya et al. 2013       | Unclear                                                                                | Yes                                                                                          | No                                         | Yes                                                       | No                                                                                                                             | Unclear                                                   | No                                  | Yes                                                  | ?                                                                                                           | ?                                                                                                              | ?                                                           | Yes                                                             | Yes                                                                                        | Yes                                                           |
| Albuquerque 2016            | Unclear                                                                                | Yes                                                                                          | No                                         | Yes                                                       | No                                                                                                                             | Unclear                                                   | No                                  | Yes                                                  | ?                                                                                                           | ?                                                                                                              | ?                                                           | Yes                                                             | Yes                                                                                        | Yes                                                           |
| Mukai et al. 2018           | Unclear                                                                                | Yes                                                                                          | No                                         | Yes                                                       | No                                                                                                                             | Unclear                                                   | No                                  | Yes                                                  | ?                                                                                                           | ?                                                                                                              | ?                                                           | Yes                                                             | Yes                                                                                        | Yes                                                           |
| Albuquerque AAS et al. 2020 | Unclear                                                                                | Yes                                                                                          | No                                         | Unclear                                                   | No                                                                                                                             | Unclear                                                   | No                                  | No                                                   | Unclear                                                                                                     | No                                                                                                             | Unclear                                                     | Yes                                                             | Yes                                                                                        | Yes                                                           |
| Albuquerque et al. 2022     | Unclear                                                                                | Yes                                                                                          | No                                         | Unclear                                                   | No                                                                                                                             | Unclear                                                   | No                                  | Yes                                                  | ?                                                                                                           | ?                                                                                                              | ?                                                           | Yes                                                             | Yes                                                                                        | Yes                                                           |
| <b>Post treatment</b>       |                                                                                        |                                                                                              |                                            |                                                           |                                                                                                                                |                                                           |                                     |                                                      |                                                                                                             |                                                                                                                |                                                             |                                                                 |                                                                                            |                                                               |
| Amir & English 1991         | Unclear                                                                                | Yes                                                                                          | No                                         | Unclear                                                   | No                                                                                                                             | Unclear                                                   | No                                  | Yes                                                  | ?                                                                                                           | ?                                                                                                              | ?                                                           | Yes                                                             | Yes                                                                                        | Unclear                                                       |
| Mitsuhashi et al. 1995      | Unclear                                                                                | Yes                                                                                          | No                                         | Unclear                                                   | No                                                                                                                             | Unclear                                                   | No                                  | Yes                                                  | ?                                                                                                           | ?                                                                                                              | ?                                                           | Yes                                                             | Yes                                                                                        | Yes                                                           |
| Buzato et al. 2005          | Unclear                                                                                | Yes                                                                                          | No                                         | Unclear                                                   | No                                                                                                                             | Unclear                                                   | No                                  | Yes                                                  | ?                                                                                                           | ?                                                                                                              | ?                                                           | Yes                                                             | Yes                                                                                        | Yes                                                           |
| Menardi AC et al. 2011      | Unclear                                                                                | Yes                                                                                          | No                                         | Unclear                                                   | No                                                                                                                             | Unclear                                                   | No                                  | Yes                                                  | ?                                                                                                           | ?                                                                                                              | ?                                                           | Yes                                                             | Yes                                                                                        | Yes                                                           |
| Zheng F et al. 2013         | Unclear                                                                                | Yes                                                                                          | No                                         | Yes                                                       | No                                                                                                                             | Unclear                                                   | No                                  | Yes                                                  | ?                                                                                                           | ?                                                                                                              | ?                                                           | Yes                                                             | Yes                                                                                        | Yes                                                           |
| Albuquerque 2016            | Unclear                                                                                | Yes                                                                                          | No                                         | Yes                                                       | No                                                                                                                             | Unclear                                                   | No                                  | Yes                                                  | ?                                                                                                           | ?                                                                                                              | ?                                                           | Yes                                                             | Yes                                                                                        | Yes                                                           |
| Albuquerque AAS et al. 2020 | Unclear                                                                                | Yes                                                                                          | No                                         | Unclear                                                   | No                                                                                                                             | Unclear                                                   | No                                  | No                                                   | Unclear                                                                                                     | No                                                                                                             | Unclear                                                     | Yes                                                             | Yes                                                                                        | Yes                                                           |
| Albuquerque et al. 2022     | Unclear                                                                                | Yes                                                                                          | No                                         | Unclear                                                   | No                                                                                                                             | Unclear                                                   | No                                  | Yes                                                  | ?                                                                                                           | ?                                                                                                              | ?                                                           | Yes                                                             | Yes                                                                                        | Yes                                                           |
| Yes                         | 0                                                                                      | 22                                                                                           | 0                                          | 9                                                         | 0                                                                                                                              | 0                                                         | 0                                   | 18                                                   | 1                                                                                                           | 0                                                                                                              | 1                                                           | 22                                                              | 22                                                                                         | 20                                                            |
| No                          | 0                                                                                      | 0                                                                                            | 22                                         | 0                                                         | 22                                                                                                                             | 0                                                         | 22                                  | 3                                                    | 0                                                                                                           | 3                                                                                                              | 0                                                           | 0                                                               | 0                                                                                          | 0                                                             |
| Unclear                     | 22                                                                                     | 0                                                                                            | 0                                          | 13                                                        | 0                                                                                                                              | 22                                                        | 0                                   | 1                                                    | 2                                                                                                           | 0                                                                                                              | 2                                                           | 0                                                               | 0                                                                                          | 2                                                             |
| ?                           | 0                                                                                      | 0                                                                                            | 0                                          | 0                                                         | 0                                                                                                                              | 0                                                         | 0                                   | 0                                                    | 19                                                                                                          | 19                                                                                                             | 19                                                          | 0                                                               | 0                                                                                          | 0                                                             |
